# Supplementary material for: Insights into the hyperthermostability and unusual region-specificity of archaeal Pyrococcus abyssi tRNA m1A57/58 methyltransferase
Source: PubMed Central journal article supplement — Nucleic Acids Res. 2010 May 18;38(18):6206–18. doi: 10.1093/nar/gkq381 (PMC2952851; doi:10.1093/nar/gkq381), 2010-05-18

**Fig. S1:** Multiple sequence alignment of TrmIs ordered with decreased *ClustalW* score compared to  $p_{ab}$ TrmI. This figure was drawn with *ESPrIpt* (1). Putative TrmIs most similar to  $p_{ab}$ TrmI and belonging to different taxonomic groups are indicated together with TrmIs with known structure. The consensus sequence motifs are indicated underneath. The secondary structural elements of  $p_{ab}$ TrmI are shown above. The cysteine residues forming the intermolecular disulfide bonds between two different monomers and Histidine at position 78, which are present only in the *Pyrococcus* and *Thermococcus* species, are labeled with a star.

**Fig. S2:** Stereo view of the SAH binding sites in Crystal Forms I and II. A Fobs-Fcalc electron density map omitting SAH calculated at the level of 1.5 standard deviation is superimposed on the structure. **A** In Crystal Form II, the dihedral angle (C4', C5', S, C $\gamma$ ) of SAH is  $-74^\circ$ . **B** The folded conformation observed in Crystal form I, molecules C and D. The dihedral angle (C4', C5', S, C $\gamma$ ) of SAH is  $-152^\circ$ . **C** The folded conformation observed in Crystal form I, molecules A and B. The dihedral angle (C4', C5', S, C $\gamma$ ) of SAH is  $-170^\circ$ .

**Fig. S3:** **A** Nucleotide sequence of  $p_{ab}$ tRNA<sup>Asp</sup>. **B**  $p_{ab}$ TrmI and  $T_I$ TrmI modify positions 57 and/or 58 in  $p_{ab}$ tRNA<sup>Asp</sup> but not position 59. Purified enzymes were incubated in the presence of SAM with [ $\alpha$ -<sup>32</sup>P]ATP or [ $\alpha$ -<sup>32</sup>P]UTP labeled T7 transcript of  $p_{ab}$ tRNA<sup>Asp</sup> for one hour at 70°C. The resulting [<sup>32</sup>P]-labeled tRNA was hydrolyzed by nuclease P1 or T2 and the generated nucleosides were analyzed by 2D-TLC on cellulose plates and autoradiography. The nucleosides were quantified by scintillation counting.

**Fig. S4:** Time course for the dimethylation of *P. abyssi* tRNA<sup>Asp</sup> by wild-type  $p_{ab}$ TrmI (triangles) and the H78Y mutant (circles). An equimolar amount of tRNA and enzyme was incubated in the presence of SAM at 70°C for different incubation times and was then digested with RNase A. The digest was analyzed by MALDI mass spectrometry (Fig. 6). The area of the peak corresponding to the dimethylated fragment  $m^1Am^1AAUp$  at  $m/z$  1340.22 was compared to that of the peaks corresponding to the non methylated ( $m/z$  1312.19) and monomethylated ( $m/z$  1326.20) fragments to obtain the percentage of dimethylated tRNA.

1. Gouet, P., Courcelle, E., Stuart, D.I. and Metz, F. (1999) ESPrIpt: analysis of multiple sequence alignments in PostScript. *Bioinformatics*, **15**, 305-308.

Figure S1

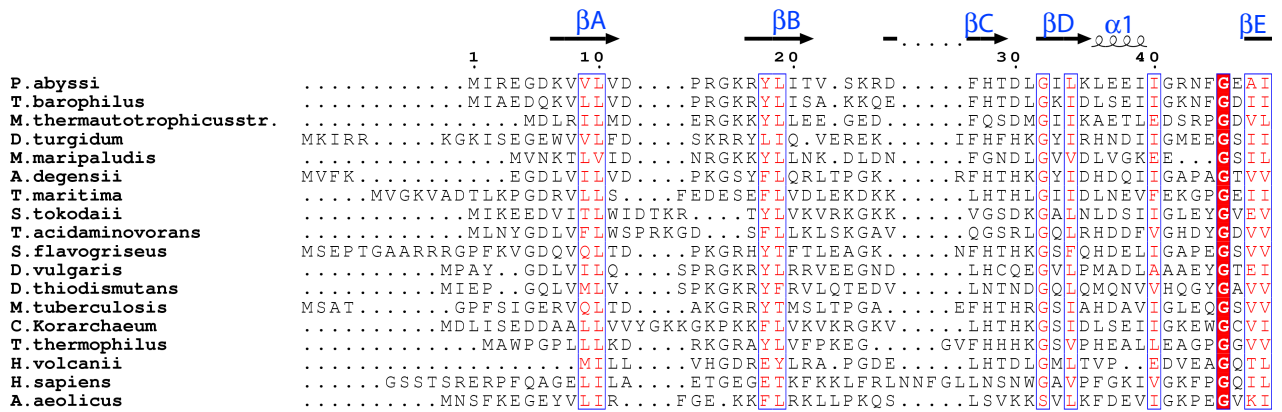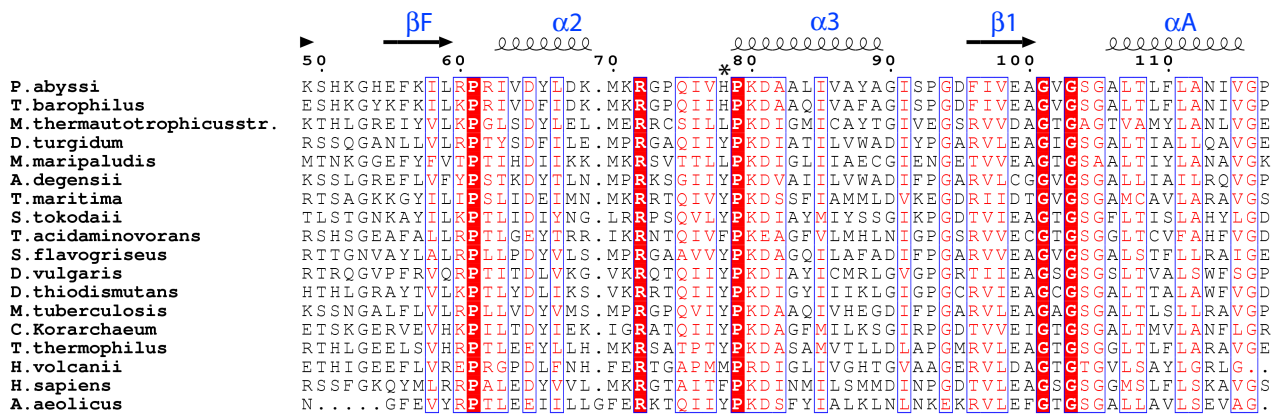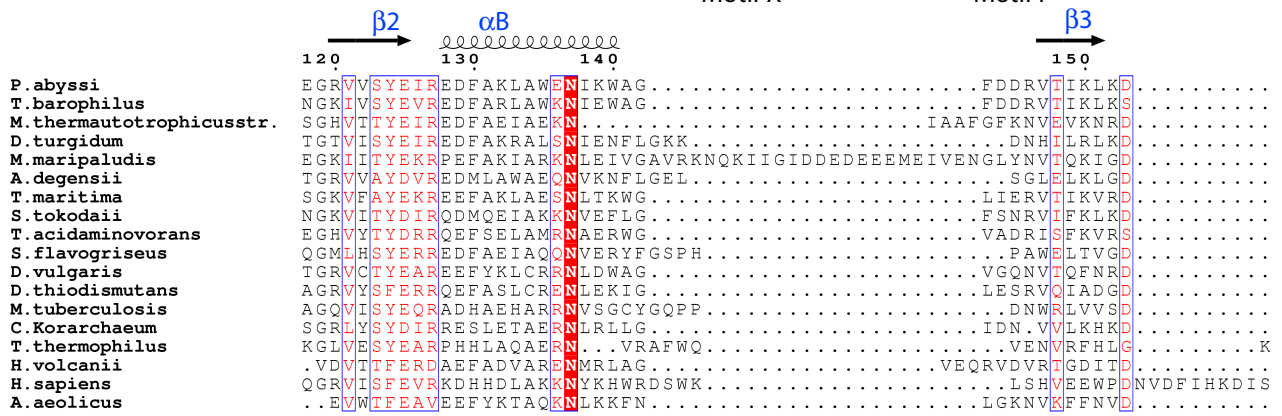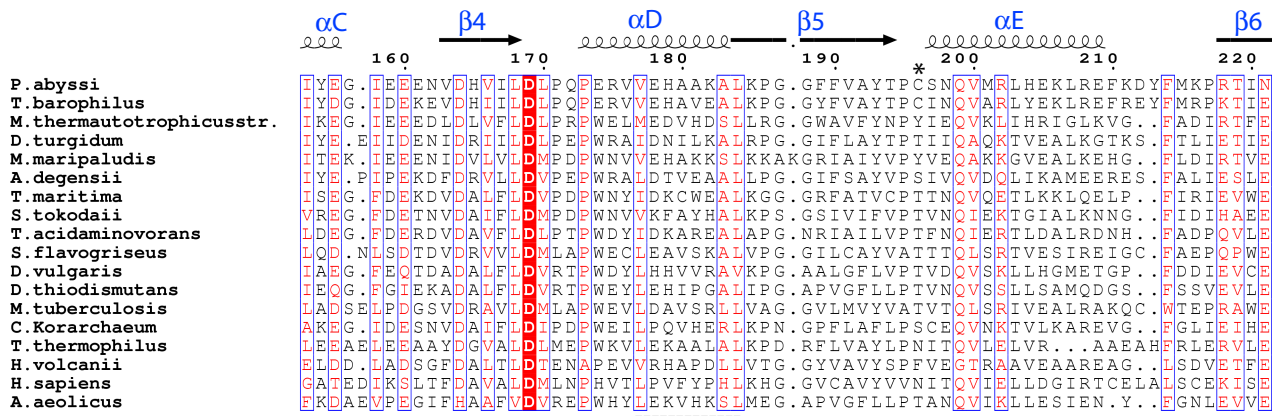

|                                | →<br>230                                                                                                                                | βG<br>→       |
|--------------------------------|-----------------------------------------------------------------------------------------------------------------------------------------|---------------|
| <i>P. abyssi</i>               | V L V F D Q E V K K E . . . . .                                                                                                         | * C M R P R T |
| <i>T. barophilus</i>           | C L V R E Q E V R E E . . . . .                                                                                                         | C I R P R T   |
| <i>M. thermotrophicus</i> str. | T I E R E I E V R K Q . . . . .                                                                                                         | G T R P R T   |
| <i>D. turgidum</i>             | T L L R P W Q I E G L . . . . .                                                                                                         | S V R P P H   |
| <i>M. maripaludis</i>          | C I V R D I E I S E K . . . . .                                                                                                         | G V R P S T   |
| <i>A. degensii</i>             | V L V R H W Q V E G K . . . . .                                                                                                         | S V R P Y H   |
| <i>T. maritima</i>             | S L F R P Y K P V P E . . . . .                                                                                                         | R L R P V D   |
| <i>S. tokodaii</i>             | L I L R E Y Q I K E N . . . . .                                                                                                         | A V R P K N   |
| <i>T. acidaminovorans</i>      | I L L R Y L K T D P R . . . . .                                                                                                         | R I R P E H   |
| <i>S. flavogriseus</i>         | S M I R N W H V E G L . . . . .                                                                                                         | A V R P D H   |
| <i>D. vulgaris</i>             | I L I R R W K P V A D . . . . .                                                                                                         | R L R P E D   |
| <i>D. thiodismutans</i>        | I L V R R Y K P V P E . . . . .                                                                                                         | R L R P E D   |
| <i>M. tuberculosis</i>         | T L Q R G W N V V G L . . . . .                                                                                                         | A V R P Q H   |
| <i>C. Korarchaeum</i>          | I L D R E Y E S D E R . . . . .                                                                                                         | R T R P A P   |
| <i>T. thermophilus</i>         | V G W R E W E V R L P . . . . .                                                                                                         | V A H P R F   |
| <i>H. volcanii</i>             | T I Q R Q M D F N D R . . . . .                                                                                                         | G S R P S T   |
| <i>H. sapiens</i>              | V I V R D W L V C L A K Q N G I L A Q V E S K I N T D V Q L D S Q E K I G V K G E L F Q E D D H E E S H S D F P Y G S F P Y V A R P V H | A R P V H     |
| <i>A. aeolicus</i>             | I L H R H Y K T I S E . . . . .                                                                                                         | R E R P E D   |

|                                | βH<br>→                                                                                                                             | β7<br>→ |
|--------------------------------|-------------------------------------------------------------------------------------------------------------------------------------|---------|
|                                | 240                                                                                                                                 | 250     |
| <i>P. abyssi</i>               | T A L V H T G Y I T F A R R I . . . . .                                                                                             |         |
| <i>T. barophilus</i>           | R M I A H T G Y I T F A R K I . . . . .                                                                                             |         |
| <i>M. thermotrophicus</i> str. | R M V G H T G Y L T F M R K I . . . . .                                                                                             |         |
| <i>D. turgidum</i>             | R M V A H T A F L T V A R R I V T Q E E N I S P M V V P S E . . . . . E R G E N Y E I E . . . . .                                   |         |
| <i>M. maripaludis</i>          | R M I G H T G Y I T T A R V C P E E V V K Y V P K K P K D A E K I E E . . . . .                                                     |         |
| <i>A. degensii</i>             | R M V G H T G F L V F A R K V V R S S E . . . . . E N C . . . . .                                                                   |         |
| <i>T. maritima</i>             | R M V A H T A Y M I F A T K V C R R E . . . . . E T E . . . . .                                                                     |         |
| <i>S. tokodaii</i>             | I G V M H T G Y I I R G R K S . . . . . L K S S V . . . . .                                                                         |         |
| <i>T. acidaminovorans</i>      | M M V G H T G Y L I F A S K S Q E G L Y D G V E Q R R S R R G E D G A E L E E T P E A . . . . .                                     |         |
| <i>S. flavogriseus</i>         | R M I G H T G F L V T A R R L A D G V E P P V R R R R P S K G A Y G E D Y K G P G G R S G S A D R D . . . . .                       |         |
| <i>D. vulgaris</i>             | R M I A H T G F L I F A R H Q E R S E E W D S F R T L G T R E R K Q E A A R Q E R L A A A R G A A D A P A D D D A G F E E . . . . . |         |
| <i>D. thiodismutans</i>        | R M V A H T G Y L I F A R L G A P G Q . . . . . D D T E P G E F T F H Q E K E I C . . . . .                                         |         |
| <i>M. tuberculosis</i>         | S M R G H T A F L V A T R R L A P G A V A P A P L G R K R E . . . . . G R D G . . . . .                                             |         |
| <i>C. Korarchaeum</i>          | W M I G H T G F I V I G R K I S . . . . . R S . . . . .                                                                             |         |
| <i>T. thermophilus</i>         | Q Q V G H T A F L V A L R R W K G S . . . . .                                                                                       |         |
| <i>H. volcanii</i>             | A G V G H T G Y L V F A R N E . . . . .                                                                                             |         |
| <i>H. sapiens</i>              | W Q P G H T A F L V K L R K V K P Q L N . . . . .                                                                                   |         |
| <i>A. aeolicus</i>             | Q M V A H T A Y L V F G R K L K T . . . . .                                                                                         |         |

**Motif VIII**

Figure S2

A

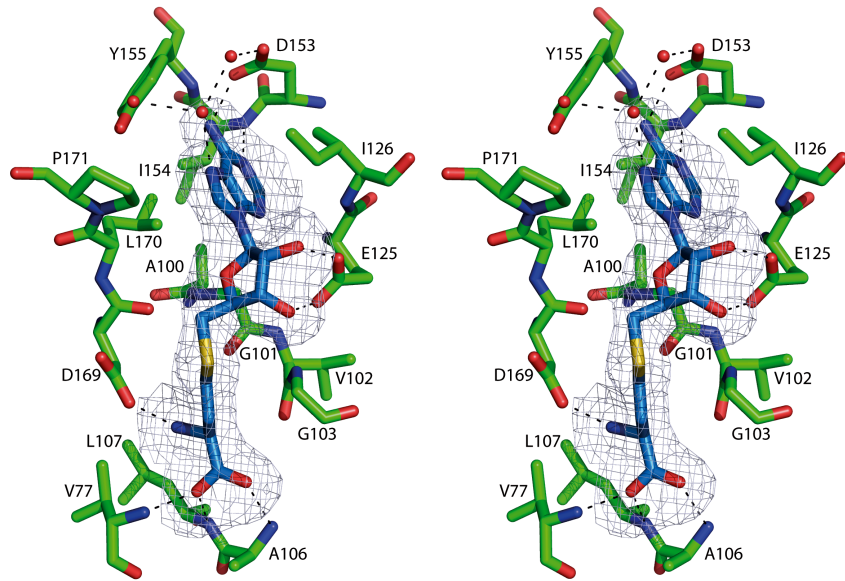

B

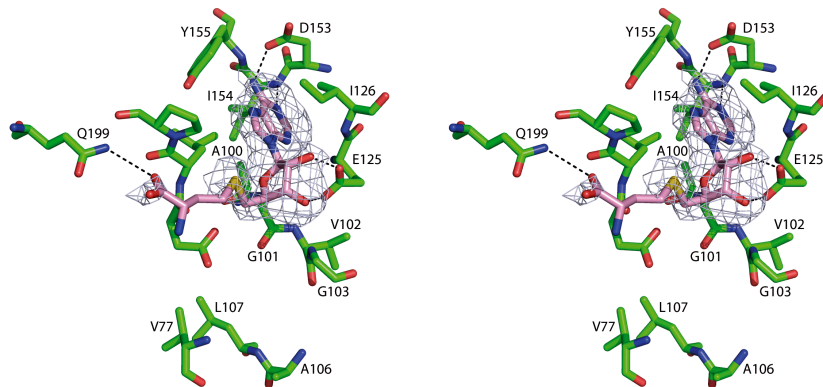

C

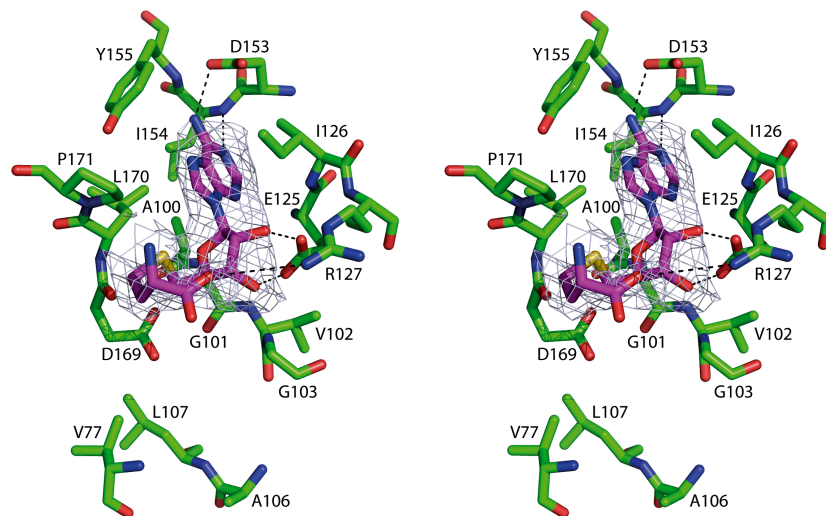



Figure S3

A

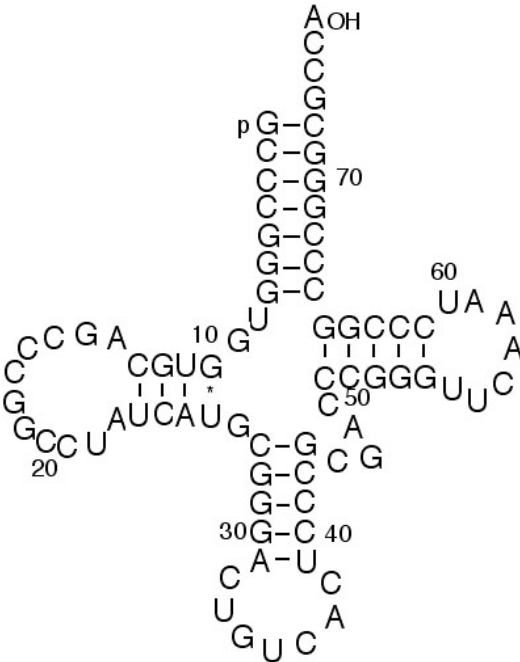

B

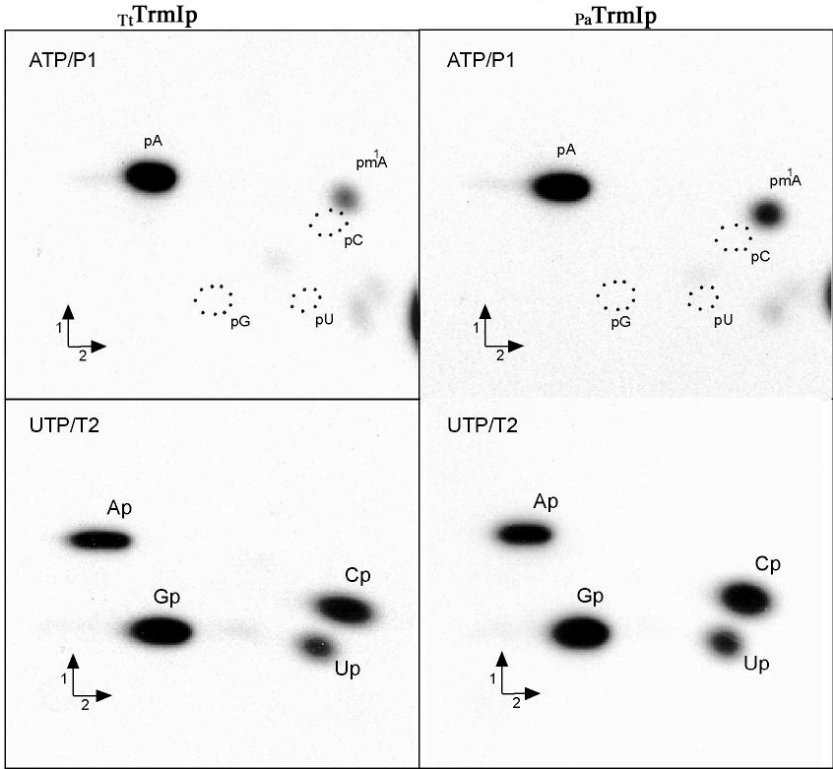

Figure S4

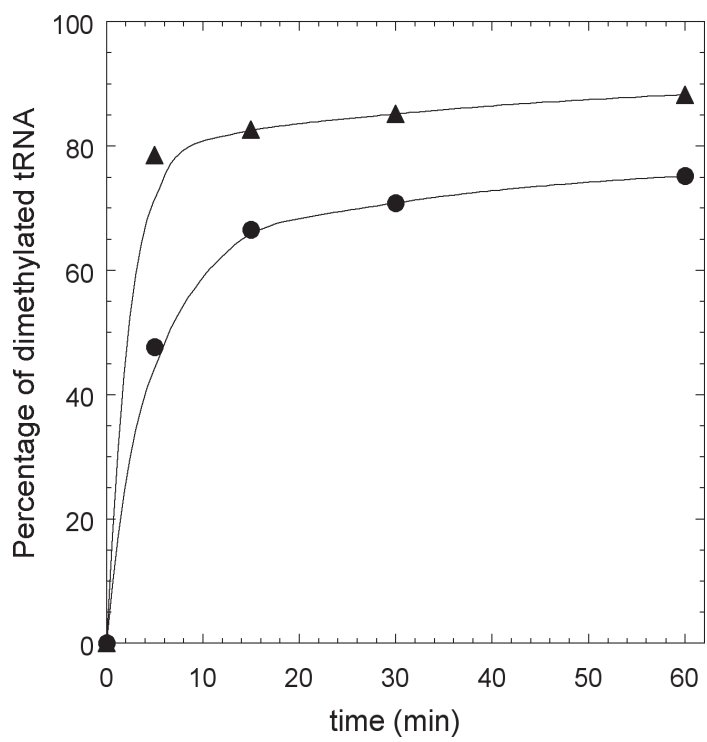

Supplement: supp_gkq381_Supp_new.pdf [file supp_gkq381_Supp_new.pdf]
